# Glucan-binding proteins are essential for shaping *Streptococcus mutans* biofilm architecture

David J. Lynch<sup>1</sup>, Tracey L. Fountain<sup>1</sup>, Joseph E. Mazurkiewicz<sup>2</sup> & Jeffrey A. Banas<sup>1</sup>

<sup>1</sup>Center for Immunology and Microbial Disease, Albany Medical College, Albany, New York, USA; and <sup>2</sup>Center for Neuroscience and Neuropharmacology, Albany Medical College, Albany, New York, USA

**Correspondence:** Jeffrey A. Banas,  
University of Iowa College of Dentistry, Dows  
Institute for Research, Dental Science N 436,  
Iowa City, IA 52242-1010. Tel.: +3 193 359  
911; fax: +3 193 358 895;  
e-mail: jeffrey-banas@uiowa.edu

Received 27 September 2006; revised 10  
November 2006; accepted 17 November 2006.  
First published online 4 January 2007.

DOI:10.1111/j.1574-6968.2006.00576.x

Editor: Robert Burne

## Keywords

biofilm; glucan-binding protein; *Streptococcus mutans*.

## Abstract

Glucan plays a central role in sucrose-dependent biofilm formation by the dental pathogen *Streptococcus mutans*. This organism synthesizes several proteins capable of binding glucan. These are divided into the glucosyltransferases that catalyze the synthesis of glucan and the nonglucosyltransferase glucan-binding proteins (Gbps). The biological significance of the Gbps has not been thoroughly defined, but studies suggest that these proteins influence virulence and play a role in maintaining biofilm architecture by linking bacteria and extracellular molecules of glucan. We engineered a panel of Gbp mutants, targeting GbpA, GbpC, and GbpD, in which each gene encoding a Gbp was deleted individually and in combination. These strains were then analyzed by confocal microscopy and the biofilm properties were quantified by the biofilm quantification software COMSTAT. All biofilms produced by mutant strains lost significant depth, but the basis for the reduction in height depended on which particular Gbp was missing. The loss of the cell-bound GbpC appeared dominant as might be expected based on losing the principal receptor for glucan. The loss of an extracellular Gbp, either GbpA or GbpD, also profoundly changed the biofilm architecture, each in a unique manner.

## Introduction

*Streptococcus mutans*, the main etiological agent in the formation of dental caries, promotes tooth decay through the ability to adhere and accumulate large numbers on the tooth surface, as well as produce and tolerate large amounts of acid (Hamada & Slade, 1980; Loesche, 1986). Biofilm formation occurs through the synthesis of water-soluble (dextran) and water-insoluble (mutan) glucans via the catalyzing activity of the glucosyltransferase enzymes (Wu-Yuan *et al.*, 1978; Tamesada *et al.*, 1997; Yu *et al.*, 1997). Glucan is believed to be the major factor contributing to the ability of *S. mutans* to adhere to the tooth surface and for aggregation of the bacterial cells within a biofilm (Munro *et al.*, 1995).

Attempts to find a glucan cell surface receptor, in order to define the poorly understood interaction of glucan with the *S. mutans* cell surface, utilized affinity chromatography of *S. mutans* proteins through a glucan column and yielded several nonenzymatic glucan-binding proteins (Gbps). Glucan-binding protein A (GbpA; 563 amino acids, 59 kDa) was the first protein discovered and, along with the recently discovered GbpD (726 amino acids, 76 kDa), contains carboxyl terminal repeats similar to those that make up the

glucan-binding domain of the glucosyltransferase (GTF) enzymes (Banas *et al.*, 1990; Shah & Russell, 2004). The glucan-binding domain of GbpC (583 amino acids, 63.5 kDa) has not been identified but this protein has been shown to promote dextran-dependent aggregation (DDAG) *in vitro* under stressful conditions (Sato *et al.*, 1997). While GbpA, GbpC, and GbpD are each secreted, only GbpA and GbpD are released; GbpC is cell wall bound and is believed to play a role in bacterial aggregation during biofilm formation (Sato *et al.*, 2002b). GbpB was the second Gbp discovered through affinity column experiments. It appears to be an essential peptidoglycan hydrolase whose glucan-binding properties are still largely undefined (Smith *et al.*, 1994; Chia *et al.*, 2001; Chia, 2002; Mattos-Graner *et al.*, 2001). As viable GbpB mutants are difficult to obtain, or grow very poorly, *gbpB* mutants were not included in the panel of mutants analyzed in this report.

While the precise functions of GbpA, GbpC, and GbpD have yet to be clearly defined, evidence accumulated to date suggests that they play a role in biofilm formation and virulence (Banas, 2004). Deletion of the *gbpA* gene was shown to affect virulence (Hazlett *et al.*, 1998; Matsumura *et al.*, 2003), and *in vitro* biofilms formed by a *gbpA* knock-out strain yielded an altered biofilm architecture consisting

of shorter microcolony heights and a more even distribution across the substratum (Hazlett *et al.*, 1999). GbpC promotes *in vitro* DDAG and several groups have reported a decrease in virulence from strains that do not produce GbpC (Nakano *et al.*, 2002; Sato *et al.*, 2002a; Matsumura *et al.*, 2003). It is possible that GbpC interacts with dextrans produced by primary plaque-colonizing species or is produced in response to stresses in the oral cavity and results in aggregation of the bacteria (Sato *et al.*, 2002b). Investigations of GbpD are still at an early stage but Shah and Russell (2004) report that *gbpD* mutants show aggregate cohesiveness and smooth surface adherence similar to the Hazlett *et al.* (1998) *gbpA* mutants. They also found GbpD to have lipase activity (Shah & Russell, 2004).

Clearly, the non-GTF GBPs influence virulence and *in vitro* phenotypes traditionally associated with sucrose-dependent adhesion and accumulation. In order to understand more completely the contribution of each of the GBPs to the pathogenic potential of *S. mutans*, we engineered a panel of mutants with each GBP deleted individually and in combination to examine the specific effect that these mutations have on biofilm structure. It is known that biofilm architecture is an important factor in the biology and virulence of biofilm-forming bacteria (Beyenal *et al.*, 2004).

## Materials and methods

### Strains and culture conditions

The strains used were: *Escherichia coli* JM109 (Promega, Madison, WI), *S. mutans* UA130, which was used as the wild-type (WT), and *S. mutans* UA130/*gbpA::erm* (Hazlett *et al.*, 1998). *Escherichia coli* were cultured in 2 × YT broth (Becton, Dickenson and Co., Sparks, MD) at 37 °C. *Streptococcus mutans* were cultured on Todd Hewitt (Becton, Dickenson and Co.) plates and in chemically defined media (CDM) (JRH Biosciences, Inc., Lenexa, KA) and were grown at 37 °C in an anaerobic chamber (5% CO<sub>2</sub>, 10% H<sub>2</sub>, 85% N<sub>2</sub>). Biofilms were cultured in CDM with 5% sucrose and grown at 37 °C in 5% CO<sub>2</sub>.

### Construction of Gbps mutants

Gene sequences for *gbpC* and *gbpD*, based on the *S. mutans* UA159 sequence (primer sequences in Table 1), were ampli-

fied using Eppendorf HotMaster Taq polymerase (Eppendorf AG, Hamburg, Germany) (Ajdric *et al.*, 2002). The strategy for engineering the mutations was allelic replacement. As this had already been completed for *gbpA* (Banas & Gilmore, 1991), it was undertaken for *gbpC* and *gbpD*. For each of these genes, an internal portion of the gene was deleted and replaced with an antibiotic resistance cassette. The PCR product for each gene was cloned into the pGEM<sup>R</sup>-T Easy Vector (Promega, Madison, WI) to obtain pGBPC and pGBPD, respectively. An internal portion of *gbpC* was removed by digesting pGBPC with the restriction enzymes, Bsu361 and BamH1. As Bsu361 cut at a single site, the initial digestion was with this enzyme, followed by blunting of the DNA ends and digestion with BamH1. The plasmid construct containing the 5' and 3' portions of the gene was gel purified using the GeneClean system (Q-BIOgene, Carlsbad, CA). The spectinomycin (*spec*) gene was amplified from plasmid pDL278 (LeBlanc *et al.*, 1992) and ligated into the TA cloning vector pCR2.1 (Invitrogen, Carlsbad, CA). The *spec* gene was digested from the plasmid using EcoRV and BamHI and inserted into similarly digested pGBPC using T4 ligase (Promega, Madison, WI) to obtain pGBPCspec. The *gbpC::Spec* gene was amplified using the aforementioned *gbpC* primers and the product was used to transform *S. mutans* WT and *gbpA::Erm* by the transformation method described by Li *et al.* (2001). Similarly, the *gbpD* gene was amplified and inserted into the pGEM<sup>R</sup>-T Easy Vector, an interior portion was excised using restriction enzymes EcoRV and MunI, and replaced with a kanamycin (*kan*) resistance gene cassette from plasmid pDL276 (Dunny *et al.*, 1991) to obtain plasmids pGBPD and pGBPDkan, respectively. The *gbpD::kan* sequence was amplified from pGBPDkan and used to transform *S. mutans* WT (UA130), *gbpA::Erm*, *gbpC::Spec*, and *gbpA::Erm/gbpC::Spec*. The resulting strains represented a panel of mutants where each glucan-binding protein gene (*gbpA*, *gbpC*, and *gbpD*) was knocked out individually and in combination.

### Screening of mutant panel

To confirm the correct genetic engineering of the mutant panel, each strain was analyzed by PCR and Southern hybridization. Genomic DNA was isolated from *S. mutans* WT and each mutant using the Gram Positive Genomic DNA Extraction Kit (Epicenter, Madison, WI). Genomic

**Table 1.** Oligos synthesized for this study

| Product           | Forward sequence           | Reverse sequence               |
|-------------------|----------------------------|--------------------------------|
| <i>spec</i>       | ATAACGTAACGTGACTGGCAAG     | GACGAGAAAGTTATGCAAGGGTTTA      |
| <i>gbpC</i>       | GATAAGAGAAAGCACTTTGG       | CTTTTTGTCCCAACCTC              |
| <i>gbpC</i> probe | TGGCATAAAAATCTTGTTGT       | Use <i>gbpC</i> reverse primer |
| <i>kan</i>        | GCATAGGCAGCGCGCTTATCA      | GGTCCCAGCGCTACGAG              |
| <i>gbpD</i>       | AGTCACACGCATGCATAATAGAAAGA | TGTTATTCTAGACTTCGCTGACCATTTA   |
| <i>gbpA</i> probe | TGGCAGATTATTGATGGTA        | GAGTATGAAATCTGCTCGTT           |

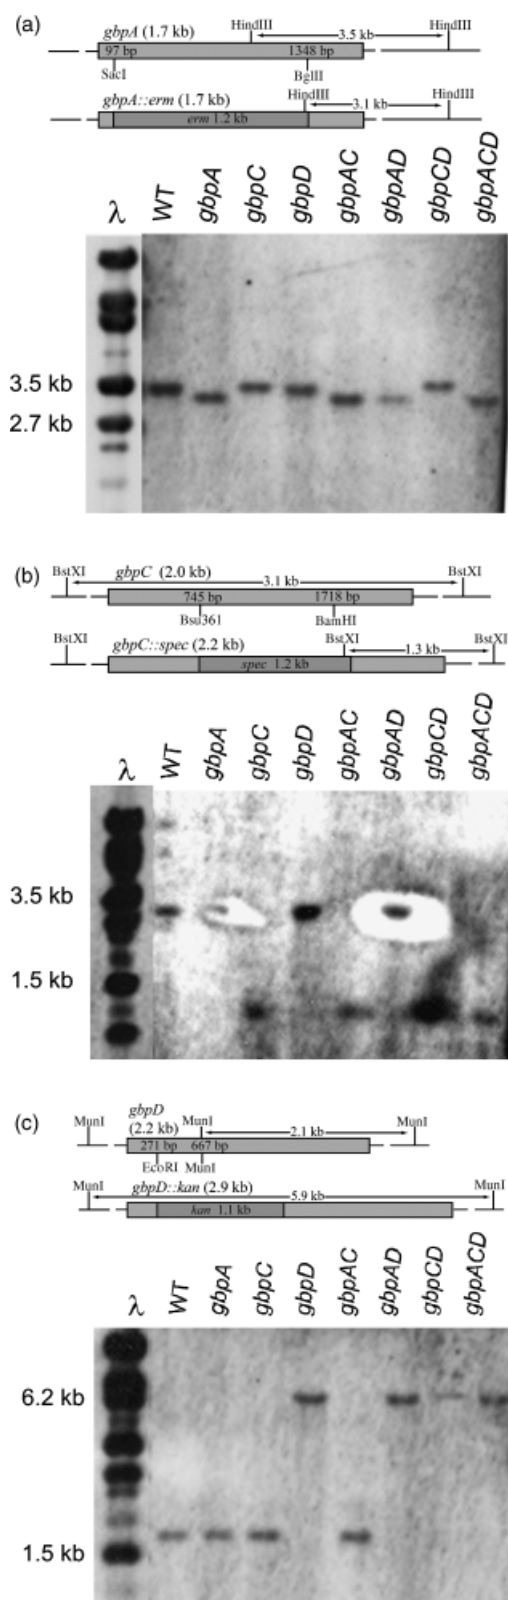

DNA was digested with HindIII (for *gbpA* mutations), BstXI (for *gbpC* mutations), or MunI (for *gbpD* mutations). Each digest of the WT and mutant panel was separated on a  $0.5 \times$  TBE agarose gel and transferred to a nylon membrane (Roche, Indianapolis, IA) by capillary Southern transfer. Probes, all based on the UA159 sequence, were generated using the Roche Dig DNA labeling kit (Roche). The 3' probe for the *gbpA* gene was generated from the PCR product of a portion of a HindIII gene fragment that measured 3.5 kb in the WT gene and 3.1 kb in the mutant (Fig. 1a, top panel). A PCR product from the 3' portion of the *gbpC* gene was used to generate a probe that bound to a BstXI gene fragment that measured 3.1 kb in the WT and 1.3 kb in the mutant *gbpC* gene due to a BstXI site within the *spec* gene. A 3' probe for the *gbpD* gene was isolated by restriction digestion from pGBPD using restriction enzymes MunI and EcoRI. This fragment was used to generate a probe that bound a MunI digested fragment that measured 2.1 kb in the WT gene and 5.9 kb in the mutant due to the loss of the MunI site from the excised portion of the *gbpD* gene. Dig-labeled probes were generated using the Dig DNA labeling kit (Roche), and probe concentration was measured by dot-blot analysis where serial dilutions of the labeled probe were blotted and compared with standards from the kit. Probes were also generated to a  $\lambda$  DNA/StyI digest that was used as a molecular weight marker.

Membranes were prehybridized in Dig Easy Hyb buffer (Roche) for 30 min and hybridized in 7 mL ( $10 \text{ ng mL}^{-1}$ ) of the respective probe at  $48^\circ\text{C}$  for 16 h. Hybridized membranes were washed in  $2 \times \text{SSC}/0.1\%$  sodium dodecyl sulfate (SDS) for 5 min twice at room temperature and then in  $0.5 \times \text{SSC}/0.1\%$  SDS for 15 min twice at  $65^\circ\text{C}$ . The membranes were rinsed in maleic acid buffer, pH 7.5, and blocked for 30 min with the blocking reagent supplied with the Roche Dig DNA labeling kit (Roche). After washing in maleic acid/0.03% Tween 20 (Fisher, Pittsburgh, PA), the membrane was incubated in AP-labeled anti-Dig antibody (Roche) ( $75 \text{ mU mL}^{-1}$ ) for 1 h. Membrane was washed twice and developed with the CSPD Chemiluminescence Substrate (Roche) for 5 min and exposed to an X-ray film.

### Growth curves

Planktonic growth rates were measured for mutants grown in CDM without sucrose by measuring the  $\text{OD}_{540 \text{ nm}}$  of each mutant over time after O/N cultures were normalized to an

**Fig. 1.** Mutant verification. Schematic diagrams and Southern blots of genomic DNA from the mutant panel digested with (a) HindIII and probed with *gbpA*, (b) BstXI and probed with *gbpC*, and (c) MunI and probed with *gbpD*. Diagrams illustrate the region of DNA replaced by antibiotic resistance and the differences in the respective restriction fragment sizes caused by the mutation.

OD of 0.04. Data points were fit by a least squares method using the nonlinear regression module of STATISTICA software. The growth rate was determined using the logistic function  $OD_{540\text{ nm}} = mn + (mx - mn) / (1 + \exp(4S(ht - \text{TIME}) / (mx - mn)))$  where  $mx$  is the final or maximum OD,  $mn$  is the initial or minimum OD,  $ht$  is the time to half max OD and the time to the maximal change in OD with respect to time, and  $S$  is the maximal rate of change (P. Feustel, pers. commun.). The slope of the curve at 50% max OD is the max growth rate and is used to compare growth rates among the mutants.

## Biofilms

Biofilms for confocal analysis were grown on glass coverslips as previously described in Banas *et al.* (2001). Briefly, 1.5 cm diameter wells containing 1.5 mL of CDM/5% sucrose were inoculated with 100  $\mu$ L of a 1.0  $OD_{540\text{ nm}}$  culture of *S. mutans*. Biofilm cultures were grown in a chambered coverglass at 37 °C in 5%  $CO_2$  on a fixed-angle rotator at a rotation speed of 10 r.p.m. and an angle of 60° for 12 h. Chambered coverglass units were assembled by removing the 1.5 cm diameter, round chambers from Sonic Seal slide wells (Nunc, Rochester, NY) and gluing them to coverglass slips (Nunc, Rochester, NY) with Krazy Glue (Elmer's, Columbus, OH).

## Confocal microscopy and image analysis

Twelve-hour biofilms were rinsed 2 $\times$  in phosphate-buffered saline (PBS) and stained for 35 min with Syto9 (Molecular Probes, Inc., Eugene, OR) and then rinsed twice with PBS. One milliliter of PBS was added to the wells to prevent drying of the biofilm during image collection. Biofilm images were collected using a Zeiss 510 Meta inverted confocal laser scanning microscope (Carl Zeiss MicroImaging, Inc., Thornwood, NY) using a  $\times 40$  objective that was zoomed out to 0.7. Five independent biofilm experiments were performed, and at least five image stacks per experiment were collected.

Image stacks were converted to individual grayscale Tiff images for each slice using the 510 META IMAGE ANALYSIS software package (Carl Zeiss MicroImaging, Inc., Thornwood, NY). COMSTAT was used to analyze the image stacks as described in Heydorn *et al.* (2000b). Gray-scale images were converted to black/white and compared with the original image to determine a threshold for the images. Each stack of an experiment was examined and the threshold value that best fit all image stacks of a trial was chosen and kept consistent for all stacks within the trial. The image stacks of the WT and each mutant were averaged and compared.

## Statistical analysis

Between 5 and 10 confocal image stacks were collected from each strain per trial. After conversion to Tiff files and thresh-

olding, the COMSTAT measurements for each image stack were compared. The values for each measurement were averaged within a strain for each trial. A one-way ANOVA was performed to determine statistically significant differences between strains within a trial. The parameter averages of each trial were then compared among the WT and mutant panel via repeated measures ANOVA (InStat) (P. Feustel, pers. commun.). For growth curves, the  $S$  value of each curve was compared by one-way ANOVA to determine statistical significance.

## Results

Southern hybridization was used to verify the genetic constructs for the mutant panel (Fig. 1). PCR fragments of WT and mutant *gbpC* and *gbpD* genes also showed size differences that corresponded to the base pair differences of the respective inserts relative to the excised fragments (data not shown). Importantly, because the strategy for engineering the mutant panel included deletion of a portion of the gene as well as the insertion of a selectable marker, the strains could be grown in the absence of selection without concern for regenerating the WT genotype. Although it is possible for truncated proteins to still retain glucan binding properties, the entire glucan-binding domain of GbpA was deleted and the 5' two-thirds of the *gbpD* gene were excised in those particular mutations. Mutants for *gbpA* and *gbpD* showed an absence of the respective proteins according to Western immunoblot analysis (Fig. S1). Although GbpC does not have the glucan-binding domain that GbpA and GbpD contain, *gbpC* mutant strains were deficient in dextran-dependent aggregation (Fig. S2).

In order to investigate whether the deletion of one or more Gbps from *S. mutans* had an effect on the growth of the bacteria, we measured the growth rates of planktonic cultures of all mutants and compared the rates with the WT strain (Fig. 2). There were no statistically significant differences in the maximum growth rates among the mutants, even though some of the mutants appeared to grow slightly more slowly than the WT. Therefore, we cannot completely rule out the possibility that subtle differences in growth affected the accumulation of biomass within biofilms produced by the mutant strains. However, if mutant biofilms were allowed to form over longer periods of time, they did not take on the characteristics of the WT biofilm at earlier time points (data not shown), indicating that growth rate is unlikely to account for the differences in biofilm architecture that will be discussed below.

Confocal analysis of WT and mutant biofilms was performed to investigate structural differences in biofilm architecture among the strains. It has been noted that analysis of biofilms is complicated by a high degree of variability from trial to trial (Heydorn *et al.*, 2000a). Our experience was

similar. For example, the biomass of the biofilm formed by the *gbpAC* mutant was significantly less than the WT in four out of four trials. However, if the data from the four trials were pooled, then the difference between the *gbpAC* mutant and WT was no longer statistically significant. In order to overcome this variability, yet also demonstrate reproducibility, we have defined significant differences in our combined data as representing two or more individual trials (out of four) with statistical significance, and without any trials showing statistical significance in the opposite direction. Additionally, we define a 'strong trend' as representing a single trial with a statistically significant difference, at least two of the other trials showing a substantial difference in the same direction, and none of the trials showing statistical significance in the opposite direction.

Quantifications of biofilm properties are presented in Table 2. All the mutants showed a significant decrease in biomass, with the exception of the *gbpA* and *gbpAD* strains. The largest reductions were associated with the loss of GbpC and were accompanied by a large population of individual bacteria across the substratum (Fig. 3). The *gbpA* mutant showed a strong trend toward covering more of the

substratum, consistent with earlier reports regarding this mutant (Hazlett *et al.*, 1999). Colonies used in O/N cultures were monitored on sucrose-containing agar plates to ensure that they displayed a rough colony phenotype that is consistent with nonrecombinant *gtf* genes. Also, biofilm cultures were plated and examined for colony roughness. There were no detectable smooth colonies detected from any mutant strain (data not shown).

WT biofilms showed a classic biofilm architecture consisting of microcolony aggregates dispersed across the substratum that grew into tall 3-dimensional structures that often spread out as the microcolonies grew away from the substratum to resemble mushroom stalk and cap-like structures (Wimpenny *et al.*, 2000). First impressions of the mutant biofilms indicated that the loss of any Gbp resulted

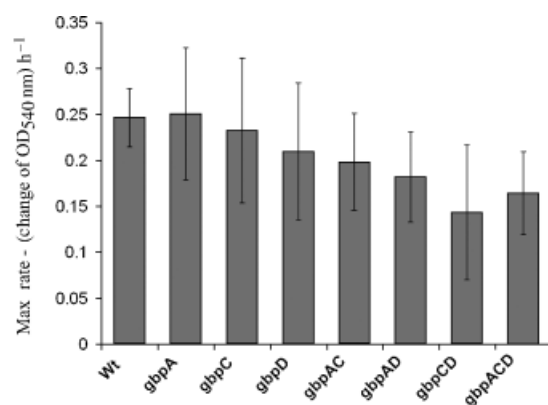

**Fig. 2.** Growth rates of mutant panel. Values represent the slope of a curve fit to graphs of three independent growth trials at the time when the OD<sub>540 nm</sub> is at 1/2 max OD (S value of plot equation). This represents the maximum change in OD for each strain, which is assumed to be the maximal growth rate. Error bars are 1 SD of the S value.

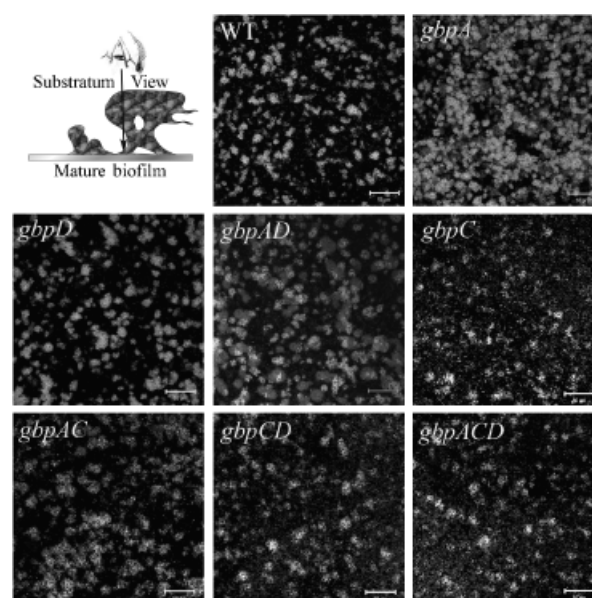

**Fig. 3.** Confocal images of mutant panel substratum layer. The first panel shows a schematic diagram of the view. Subsequent panels are images of the first slice of a representative image stack for each strain, or the portion of the biofilm adherent to the substratum. The bacteria appear light (fluorescent) against the black background. The white bars are 50 μm.

**Table 2.** COMSTAT analyses of wild-type and mutant biofilms\*

|                                                                        | Wild-type     | <i>gbpA</i>                | <i>gbpC</i>          | <i>gbpD</i>         | <i>gbpAC</i>       | <i>gbpAD</i>             | <i>gbpCD</i>        | <i>gbpACD</i>       |
|------------------------------------------------------------------------|---------------|----------------------------|----------------------|---------------------|--------------------|--------------------------|---------------------|---------------------|
| Biomass [ $\mu\text{m}^3 (\mu\text{m}^2)^{-1}$ ]                       | 7.55 ± 3.10   | 6.86 ± 4.01                | <b>4.64</b> ± 3.59   | <b>5.15</b> ± 2.56  | <b>3.13</b> ± 1.78 | 5.31 ± 2.29              | <b>4.90</b> ± 1.99  | <b>4.12</b> ± 2.05  |
| Substratum coverage (%)                                                | 30.91 ± 3.77  | 43.23 <sup>†</sup> ± 21.85 | 33.09 ± 21.30        | 30.89 ± 13.50       | 22.73 ± 10.80      | 31.63 ± 11.97            | 36.55 ± 17.55       | 29.34 ± 18.47       |
| Average biofilm thickness (μm)                                         | 32.48 ± 13.68 | <b>10.34</b> ± 4.58        | <b>12.85</b> ± 10.68 | <b>10.90</b> ± 6.95 | <b>7.54</b> ± 3.55 | <b>11.63</b> ± 8.84      | <b>10.34</b> ± 4.94 | <b>10.28</b> ± 2.05 |
| Surface area (μm <sup>2</sup> ) (× 10 <sup>5</sup> )                   | 10.80 ± 3.71  | <b>5.45</b> ± 1.54         | 8.73 ± 5.31          | <b>5.30</b> ± 2.42  | 6.88 ± 2.60        | 7.20 <sup>†</sup> ± 4.38 | 11.40 ± 5.22        | 9.07 ± 4.75         |
| Ratio of surface area to biovolume (μm <sup>2</sup> μm <sup>-3</sup> ) | 1.36 ± 0.44   | <b>0.87</b> ± 0.30         | <b>1.96</b> ± 0.54   | 1.03 ± 0.27         | <b>2.29</b> ± 0.76 | 1.31 ± 0.61              | <b>2.11</b> ± 0.30  | <b>2.12</b> ± 0.41  |

\*Values are ± SD; those in bold are significantly different from the wild-type.

<sup>†</sup>Values show a strong trend away from the wild-type.

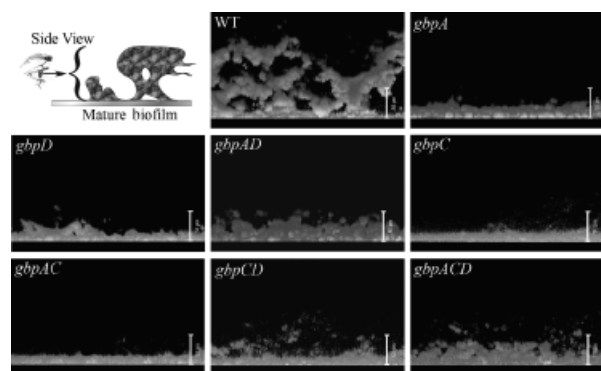

**Fig. 4.** Side view of mutant panel. The first panel shows a schematic diagram of the view. Subsequent panels are images of the side view of the maximum density projection from a representative image stack for each mutant. The bacterial aggregates appear light (fluorescent) against the black background. White bars are 50  $\mu$ m.

in an absence, or severe reduction, of tall cap and stalk-like structures (Fig. 4 and lab observations).

The average thickness measurements of all of the mutant strains were significantly lower than the wild type. Side-view images dramatically show these differences (Fig. 4). The reason for the decrease in biofilm thickness varied based on the particular Gbp lost. Mutants that lost one of the extracellular Gbps, GbpA or GbpD, showed a significant reduction in surface area. The *gbpAD* double knockout showed a strong trend toward the same phenotype. All of the mutants that no longer expressed GbpC formed biofilms with significantly greater surface area to biovolume ratios. The *gbpA* mutant was the only mutant to show a significant decrease in the ratio of surface area to biovolume.

As the Gbps are thought to provide structural support by binding glucan, we observed the mutants and WT strains grown in biofilms without sucrose. As expected, the WT and all mutant strains formed much less prolific biofilms in which cells were scattered about the substratum as chains or individually (Fig. S3). There were few aggregates that were generally very small and did not grow above 7–10  $\mu$ m. COMSTAT analyses of sucrose-independent biofilms showed no differences in biomass, substratum coverage, average biofilm thickness, or total surface area between the WT and mutant strains (Table S1). The values of each mutant in Table 2 were compared with the values of the same mutant grown without sucrose in Table S1 and were significantly different. This confirms that the architectural differences in biofilms formed by *gbp* mutant strains were sucrose-dependent.

## Discussion

Bacterial biofilms are a highly dynamic and heterogeneous community of cells and many factors, such as substrate concentration and flow, contribute to the architecture of a

biofilm (Szewzyk & Schink, 1987; van Loosdrecht *et al.*, 1995). Bacterial aggregates in a biofilm are generally enveloped in large amounts of exopolymeric matrix and are interspersed by less cell dense regions of the matrix (Nivens *et al.*, 1995). Here, we suggest that proteins that interact with the matrix should have a profound effect on the structure of a biofilm. Each cell in a biofilm has its own niche and specific relation to other bacteria within the biofilm (Costerton *et al.*, 1994). Any alteration in biofilm structure would disrupt this environment.

We created a panel of Gbp mutants and examined the biofilm architecture to understand the roles that these proteins play in biofilm architecture. The loss of Gbp proteins did not significantly affect *S. mutans* growth or metabolism. Therefore, growth differences could not account for the differences in biofilm development and architecture that were observed.

The most dramatic effect associated with the loss of any Gbp was a significant reduction in biofilm depth. For mutants that no longer expressed GbpC, the reduction in biofilm depth was likely due to a significant loss of biomass attributable to the role of GbpC as a cell-surface glucan receptor. The loss of GbpC also reduced the ability of the bacteria to aggregate, resulting in more individual bacteria scattered through the substratum view of the biofilms. The loss of GbpC also resulted in significant increases in the surface area to biovolume ratios, where biovolume represents the total amount of positive pixels throughout the image stack. Therefore, these mutants retained facets of biofilm architecture that affected surface area, but lost significant biovolume as a consequence of losing biomass. The additional loss of GbpA or GbpD did not diminish the surface area or appreciably change the biofilm phenotype, indicating that GbpC contributes the dominant phenotype relative to Gbps A and D.

The loss of GbpA led to a flattening of the biofilm and a strong trend toward increased substratum coverage as expected from earlier reports (Hazlett *et al.*, 1999). The loss of GbpD, the other secreted Gbp, resulted in a significant loss of biomass. Both extracellular Gbps likely confer structural rigidity to the biofilm that allows the elevation of microcolonies. However, the loss of GbpA can be likened to the biofilm 'falling down' and spreading out over the substratum, whereas the loss of GbpD appears to weaken the cohesiveness of the biofilm, leading to both a decrease in elevation and a loss of biomass. The loss of either extracellular Gbp led to a significant reduction in surface area consistent with these Gbps making an essential contribution to the architecture of the biofilm. For the *gbpA* mutant, this change was also reflected in a significant decrease in the surface area to biovolume ratio. This was not true for the *gbpD* mutant most likely because of a concomitant loss of biovolume due to the reduction in biomass.

It can be concluded that each Gbp makes a unique contribution to the development of a mature biofilm. The extracellular Gbps A and D contribute to the scaffolding that allows *S. mutans* to build a biofilm outward from the substratum. The role of GbpA may be to link glucan molecules, more or less independent of individual bacteria, as its loss does not adversely affect biomass. GbpD may provide elements of both scaffolding and cohesiveness between bacteria and exopolysaccharide. However, the role of GbpC as a bond between bacteria and glucan is dominant. The loss of GbpC reduces biomass and bacterial aggregates, and overshadows any effect that further loss of Gbps might contribute.

## Acknowledgements

We thank Dr Arne Heydorn for providing us with the COMSTAT toolbox, and Dr Paul Feustel for assistance with statistical analyses.

This research was supported by grant DE10058 from the NIDCR.

## References

- Ajdic D, McShan WM, McLaughlin RE *et al.* (2002) Genome sequence of *Streptococcus mutans* UA159, a cariogenic dental pathogen. *Proc Natl Acad Sci USA* **99**: 14434–14439.
- Banas JA (2004) Virulence properties of *Streptococcus mutans*. *Front Biosci* **9**: 1267–1277.
- Banas JA & Gilmore KS (1991) Analysis of *Streptococcus mutans* and *Streptococcus downei* mutants insertionally inactivated in the *gbp* and *gtfs* genes. *Genetics and molecular biology of streptococci, lactococci, and enterococci* (Dunny GM, Cleary PP & McKay LL, eds), pp. 281–283. American Society for Microbiology, Washington, DC.
- Banas JA, Russell RRB & Ferretti JJ (1990) Sequence analysis of the gene for the glucan-binding protein of *Streptococcus mutans* Ingbritt. *Infect Immunol* **58**: 667–673.
- Banas JA, Hazlett KRO & Mazurkiewicz JE (2001) An *in vitro* model for studying the contributions of the *Streptococcus mutans* glucan-binding protein-A to biofilm structure. *Meth Enzymol* **337**: 425–433.
- Beyenal H, Lewandowski Z & Harkin G (2004) Quantifying biofilm structure: facts and fiction. *Biofouling* **20**: 1–23.
- Chia J-S (2002) *Genetic and Functional Characterization of a General Stress Protein from Streptococcus mutans*, pp. 45–46. American Society for Microbiology, Asheville, NC.
- Chia J-S, Chang LY, Shun C-T, Chang Y-Y & Chen J-Y (2001) A 60-kilodalton immunodominant glycoprotein is essential for cell wall integrity and the maintenance of cell shape in *Streptococcus mutans*. *Infect Immunol* **69**: 6987–6998.
- Costerton JW, Lewandowski Z, DeBeer D, Caldwell D, Korber D & James G (1994) Biofilms, the customized microniche. *J Bacteriol* **176**: 2137–2142.
- Dunny GM, Lee LN & LeBlanc DJ (1991) Improved electroporation and cloning vector system for gram-positive bacteria. *Appl Environ Microbiol* **57**: 1194–1201.
- Hamada S & Slade HD (1980) Biology, immunology, and cariogenicity of *Streptococcus mutans*. *Microbiol Rev* **44**: 331–384.
- Hazlett KRO, Mazurkiewicz JE & Banas JA (1999) Inactivation of the *gbpa* gene of *Streptococcus mutans* alters structural and functional aspects of plaque biofilm which are compensated by recombination of the *gtfb* and *gtfc* genes. *Infect Immunol* **67**: 3909–3914.
- Hazlett KRO, Michalek SM & Banas JA (1998) Inactivation of the *gbpa* gene of *Streptococcus mutans* increases virulence and promotes *in vivo* accumulation of recombinations between the glucosyltransferase B and C genes. *Infect Immunol* **66**: 2180–2185.
- Heydorn A, Ersboll BK, Hentzer M, Parsek MR, Givskov M & Molin S (2000a) Experimental reproducibility in flow-chamber biofilms. *Microbiology* **146**: 2409–2415.
- Heydorn A, Nielsen AT, Hentzer M, Sternberg C, Givskov M, Ersboll BK & Molin S (2000b) Quantification of biofilm structures by the novel computer program COMSTAT. *Microbiology* **146**: 2395–2407.
- LeBlanc DJ, Lee LN & bu-Al-Jaibat A (1992) Molecular, genetic, and functional analysis of the basic replicon of pva380-1, a plasmid of oral streptococcal origin. *Plasmid* **28**: 130–145.
- Li YH, Lau PC, Lee JH, Ellen RP & Cvitek DG (2001) Natural genetic transformation of *Streptococcus mutans* growing in biofilms. *J Bacteriol* **183**: 897–908.
- Loesche WJ (1986) Role of *Streptococcus mutans* in human dental decay. *Microbiol Rev* **50**: 353–380.
- Matsumura M, Izumi T, Matsumoto M, Tsuji M, Fujiwara T & Ooshima T (2003) The role of glucan-binding proteins in the cariogenicity of *Streptococcus mutans*. *Microbiol Immunol* **47**: 213–215.
- Mattos-Graner RO, Jin S, King WF, Chen T, Smith DJ & Duncan MJ (2001) Cloning of the *Streptococcus mutans* gene encoding glucan binding protein B and analysis of genetic diversity and protein production in clinical isolates. *Infect Immunol* **69**: 6931–6941.
- Munro CL, Michalek SM & Macrina FL (1995) Sucrose-derived exopolymers have site-dependent roles in *Streptococcus mutans*-promoted dental decay. *FEMS Microbiol Lett* **128**: 327–332.
- Nakano K, Matsumura M, Kawaguchi M, Fujiwara T, Sobue S, Nakagawa I, Hamada S & Ooshima T (2002) Attenuation of glucan-binding protein C reduces the cariogenicity of *Streptococcus mutans*: analysis of strains isolated from human blood. *J Dent Res* **81**: 376–379.
- Nivens DE, Palmer RJ Jr & White DC (1995) Continuous nondestructive monitoring of microbial biofilms: a review of analytical techniques. *J Indus Microbiol* **15**: 263–276.

- Sato Y, Okamoto K & Kizaki H (2002a) *Gbpc* and *pac* gene mutations detected in *Streptococcus mutans* strain GS-5. *Oral Microbiol Immunol* **17**: 263–266.
- Sato Y, Senpuku H, Okamoto K, Hanada N & Kizaki H (2002b) *Streptococcus mutans* binding to solid phase dextran mediated by the glucan-binding protein C. *Oral Microbiol Immunol* **17**: 252–256.
- Sato Y, Yamamoto Y & Kizaki H (1997) Cloning and sequence analysis of the *gbpc* gene encoding a novel glucan-binding protein of *Streptococcus mutans*. *Infect Immunol* **65**: 668–675.
- Shah DS & Russell RR (2004) A novel glucan-binding protein with lipase activity from the oral pathogen *Streptococcus mutans*. *Microbiology* **150**: 1947–1956.
- Smith DJ, Akita H, King WF & Taubman MA (1994) Purification and antigenicity of a novel glucan-binding protein of *Streptococcus mutans*. *Infect Immunol* **62**: 2545–2552.
- Szewzyk U & Schink B (1987) Surface colonization by and life cycle of *Pelobacter acidigallicci* studied in a continuous-flow micro-chamber. *J Gen Microbiol* **134**: 183–190.
- Tamesada M, Kawabata S, Bian Z, Fujiwara T, Kimura S & Hamada S (1997) Modification of sucrose dependent cell adherence by deletion and reintroduction of the *gtf* genes in *Streptococcus mutans*. *Adv Exp Med Biol* **418**: 665–668.
- van Loosdrecht MCM, Eikelboom D, Gjaltema A, Mulder A, Tjihuis L & Heijnen JJ (1995) Biofilm structures. *Water Sci Technol* **32**: 35–43.
- Wimpenny J, Manz W & Szewzyk U (2000) Heterogeneity in biofilms. *FEMS Microbiol Rev* **24**: 661–667.
- Wu-Yuan CD, Tai S & Slade HD (1978) Dextran/glucan binding by *Streptococcus mutans*: the role of molecular size and binding site in agglutination. *Adv Exp Med Biol* **107**: 737–748.
- Yu H, Nakano Y, Yamashita Y, Oho T & Koga T (1997) Effects of antibodies against cell surface protein antigen pac-glucosyltransferase fusion proteins on glucan synthesis and cell adhesion of *Streptococcus mutans*. *Infect Immunol* **65**: 2292–2298.

## Supplementary material

The following supplementary material is available for this article:

**Fig. S1.** Western blot showing loss of GbpA or GbpD

**Fig. S2.** Wild-type and mutant dextran dependent aggregation

**Fig. S3.** Substratum views of sucrose-independent biofilms

**Table S1.** COMSTAT analysis of sucrose-independent biofilms

This material is available as part of the online article from: <http://www.blackwell-synergy.com/doi/abs/10.1111/j.1574-6968.2006.00576.x> (This link will take you to the article abstract).

Please note: Blackwell Publishing are not responsible for the content or functionality of any supplementary materials supplied by the authors. Any queries (other than missing material) should be directed to the corresponding author for the article.
